# Supplementary material for: Human Adipose-Derived Hydrogel Characterization Based on In Vitro ASC Biocompatibility and Differentiation
Source: Hindawi journal article supplement (doi:10.1155/2019/9276398), 2019-12-27
Supplement: f1 [file 9276398.f1.pdf]

**Table S1:** ASC doubling times; based on viable cell count from 24 to 96 hours of cell culture.

| Culture time (hours)      | No. of viable cells |        |        | Doubling time (hours) |              |              |
|---------------------------|---------------------|--------|--------|-----------------------|--------------|--------------|
|                           | Sample              |        |        | Sample                |              |              |
|                           | 1                   | 2      | 3      | 1                     | 2            | 3            |
| 24                        | 11125               | 11125  | 13125  |                       |              |              |
| 48                        | 25000               | 20000  | 25000  | 41.09                 | 56.72        | 51.63        |
| 72                        | 40000               | 45000  | 50000  | 39.00                 | 35.71        | 37.31        |
| 96                        | 90000               | 120000 | 125000 | 31.83                 | 27.98        | 29.52        |
| <b>Mean Doubling time</b> |                     |        |        | <b>37.31</b>          | <b>40.14</b> | <b>39.49</b> |

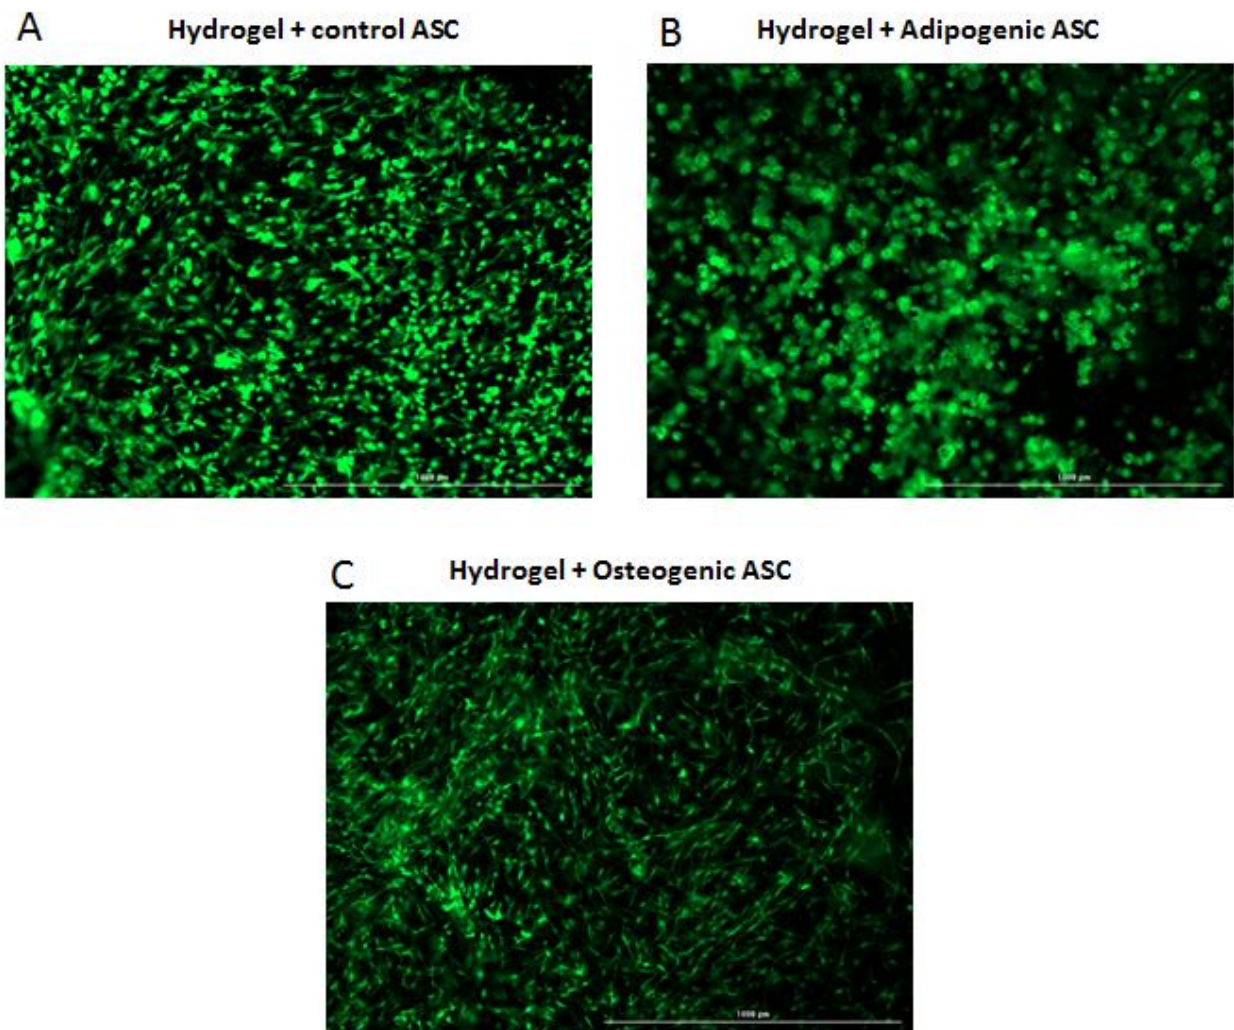

**Figure S1:** Viability and morphology of ASCs seeded on DAT hydrogel. (A-C) Representative images of calcein AM stained ASCs seeded on DAT hydrogel after 28 days of culture in stromal media (A), adipogenic media (B), and osteogenic media (C). Scale bar 1000  $\mu\text{m}$ .

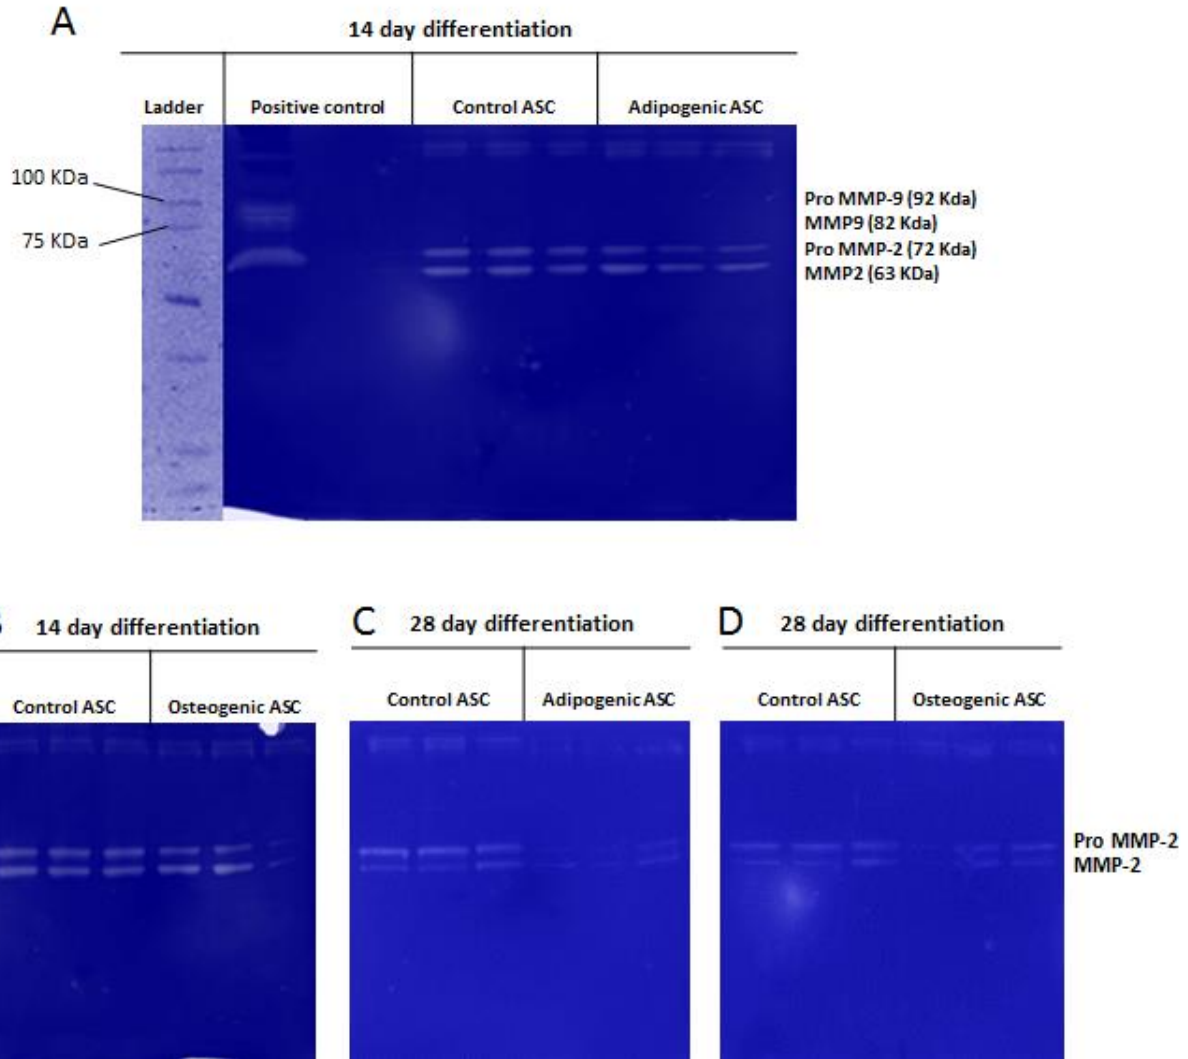

**Figure S2:** Detection of MMP-2 using gelatin zymography. (A) Image of gelatin zymogram containing a standard protein ladder, positive control for MMP-2 and MMP-9, 14-day control and adipogenic samples. (A-D) Bands for Pro MMP-2 and MMP-2 detected in 14- and 28- day samples cultured in stromal, adipogenic, and osteogenic samples.
